# Supplementary material for: A novel low-dimensional heteroatom doped Nd2O3 nanostructure for enhanced electrochemical sensing of carbendazim
Source: Royal Society of Chemistry journal article supplement (doi:10.1039/c9nj02778e), 2019-01-01
Supplement: c9nj02778e1.pdf [file c9nj02778e1.pdf]

## Supporting Information

### A novel low-dimensional heteroatom doped $\text{Nd}_2\text{O}_3$ nanostructures for enhanced electrochemical sensing of carbendazim

Yuanzhen Zhou \*, Yang Li, Ping Han, Yuan Dang, Mengyi Zhu, Qian Li, Yile

Fu

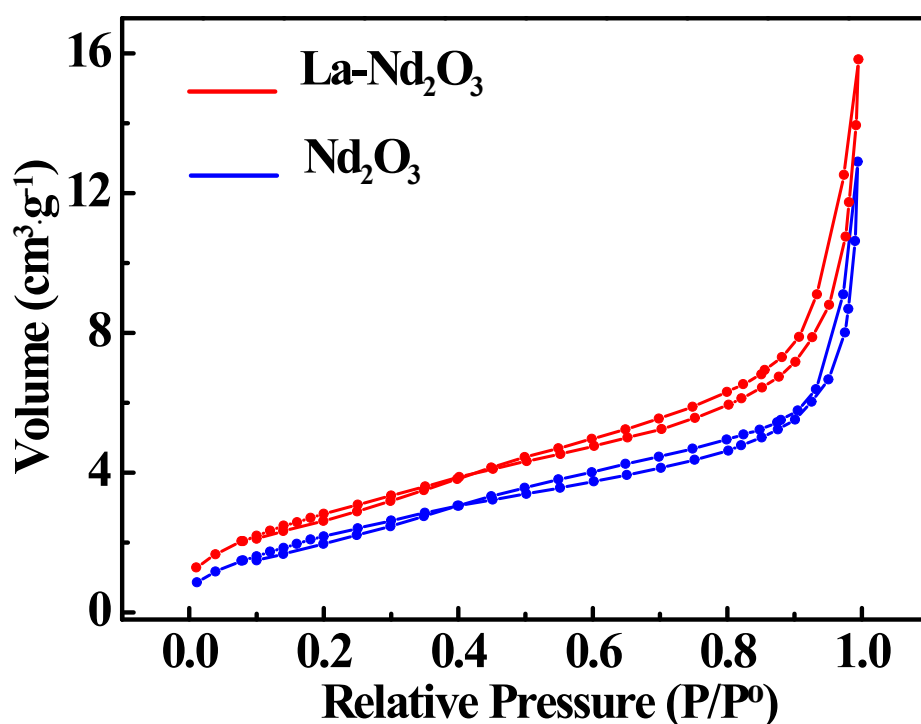

**Figure S1.** The BET results of  $\text{Nd}_2\text{O}_3$  ( $12.19 \text{ m}^2 \cdot \text{g}^{-1}$ ) and  $\text{La-Nd}_2\text{O}_3$  ( $13.80 \text{ m}^2 \cdot \text{g}^{-1}$ ).

**Table S1.** Crystallite size and micro-strain of the prepared samples.

| Samples                    | 2 Theta | FWHM ( $\beta$ ) | D (nm) | Micro-strain ( $\epsilon$ ) |
|----------------------------|---------|------------------|--------|-----------------------------|
| $\text{Nd}_2\text{O}_3$    | 30.77   | 0.226            | 7.14   | 0.0485                      |
| $\text{La-Nd}_2\text{O}_3$ | 30.88   | 0.163            | 9.91   | 0.0350                      |

**Table S2.** Analysis of XPS spectra for  $\text{La-Nd}_2\text{O}_3$ .

---

| Components in La-doped Nd <sub>2</sub> O <sub>3</sub> | Binding energy (eV) |
|-------------------------------------------------------|---------------------|
| O1s                                                   | 531.5, 529          |
| Nd 3d <sub>5/2</sub>                                  | 983, 983.3, 979.4   |
| Nd 3d <sub>3/2</sub>                                  | 1006.0              |
| La 3d <sub>3/2</sub>                                  | 852.6, 854.9, 855.7 |
| La 5p                                                 | 19.0                |
| La 5s                                                 | 38.0                |

---
